# Supplementary material for: Flagellar-based motility accelerates IgA-mediated agglutination of Salmonella Typhimurium at high bacterial cell densities
Source: Frontiers journal article supplement (doi:10.3389/fimmu.2023.1193855), 2023-05-18
Supplement: Data_Sheet_1.pdf [file Data_Sheet_1.pdf]

## Supplementary Material

# Flagellar-based motility accelerates IgA-mediated agglutination of *Salmonella* Typhimurium at high bacterial cell densities

Samantha K. Lindberg, Graham G. Willsey, Nicholas J. Mantis\*

\* Correspondence: Nicholas J. Mantis: [nicholas.mantis@health.ny.gov](mailto:nicholas.mantis@health.ny.gov)

## 1 Supplementary Data

### 1.1 Supplementary Figures

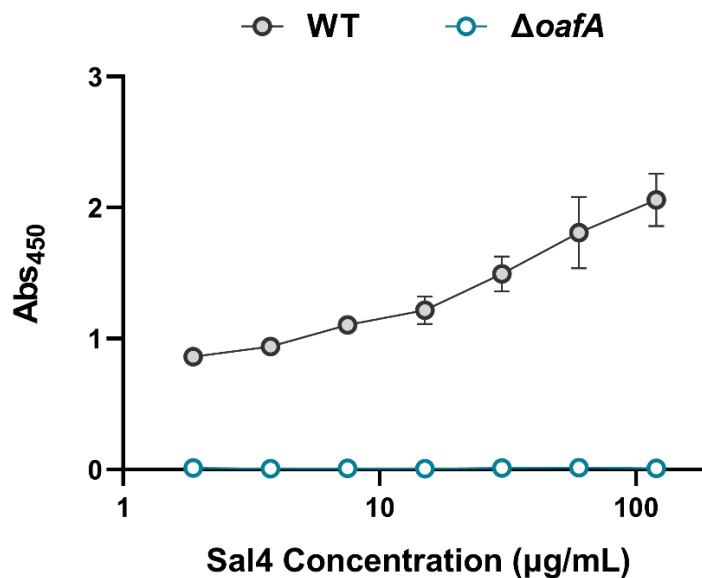

**Supplementary Figure 1. Sal4 IgA binds to STm expressing the O5 antigen as measured by ELISA.** Mid-log phase cultures of WT (grey circles; O5<sup>+</sup>) and  $\Delta oafA$  (teal circles; O5<sup>-</sup>) were washed in PBS, standardized to an OD<sub>600</sub> of 1.0, and incubated in a 96-well plate at 4°C overnight. Plates were incubated in blocking solution for 2 h, washed with 0.1% PBS-T, and then incubated with Sal4 IgA for 1 h. Plates were washed again, incubated with HRP-conjugated anti-IgA secondary antibodies, and finally developed with TMB substrate, as detailed in the Materials and Methods. Data represents two biological replicates averaged from three technical replicates.

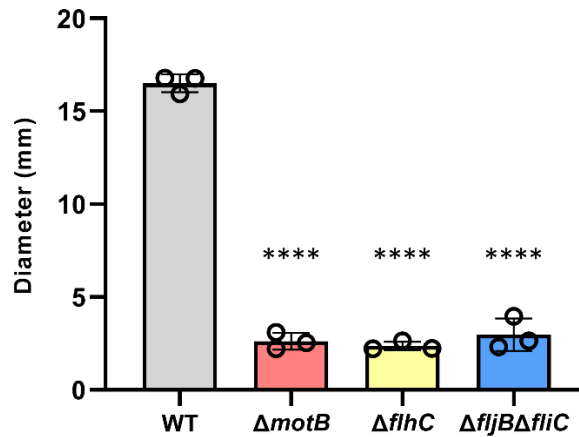

**Supplementary Figure 2. Confirmation of reduced swimming in motility-deficient mutant strains.** Plates of 0.3% LB agar were stab inoculated with 1.0  $\mu$ L of overnight cultures of WT,  $\Delta motB$ ,  $\Delta flhC$ , and  $\Delta fljB\Delta fliC$  and then incubated at 37°C for 3.5 h. Plates were then imaged and the diameter (mm) of the bacterial migration was measured using Fiji (version 2.9.0). Data represents three biological experiments each performed with two technical replicates. Statistical significance was determined by ordinary one-way ANOVA followed by Dunnett's post hoc multiple comparisons test. Asterisks (\*\*\*\*) indicate  $p < 0.0001$  as compared to the WT control group.

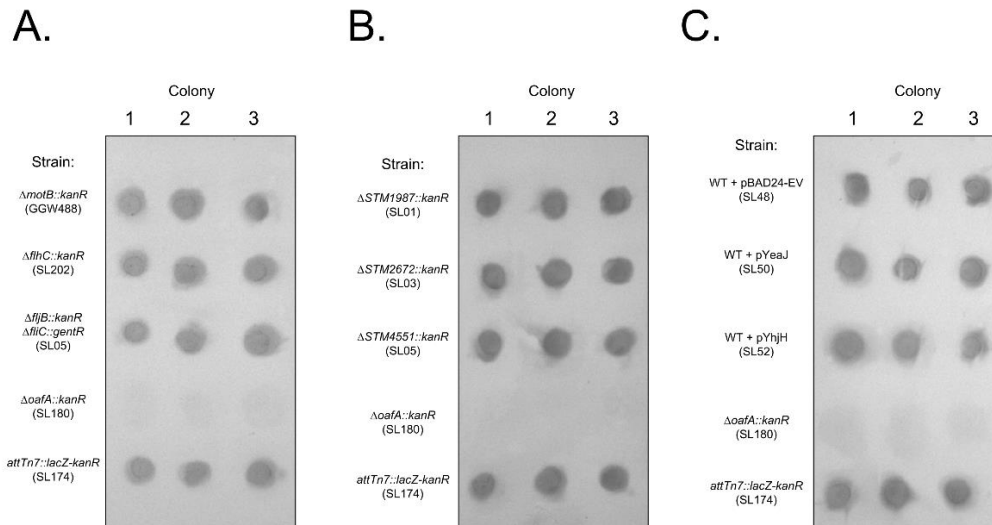

**Supplementary Figure 3. Detection of O5 epitope expression for STm strains used in this study.** For panels A, B, and C, representative dot blots of the indicated strains are shown. Cultures were grown for 3 hours in a microtiter plate at 37°C with aeration and 3  $\mu$ L was spotted onto a nitrocellulose membrane. The membrane was allowed to air-dry at room temperature and subsequently incubated in blocking solution at 4°C on a plate rocker overnight. The membrane was washed, incubated with 10  $\mu$ g/mL Sal4 IgA for 1.5 hours, washed, and then incubated with goat anti-mouse IgA-HRP (alpha-chain specific) secondary antibody for 1 hour. Antibody binding was detected via addition of TMB substrate as detailed in the Materials and Methods. Each dot for each strain represents an individual colony and each assay was performed in duplicate.

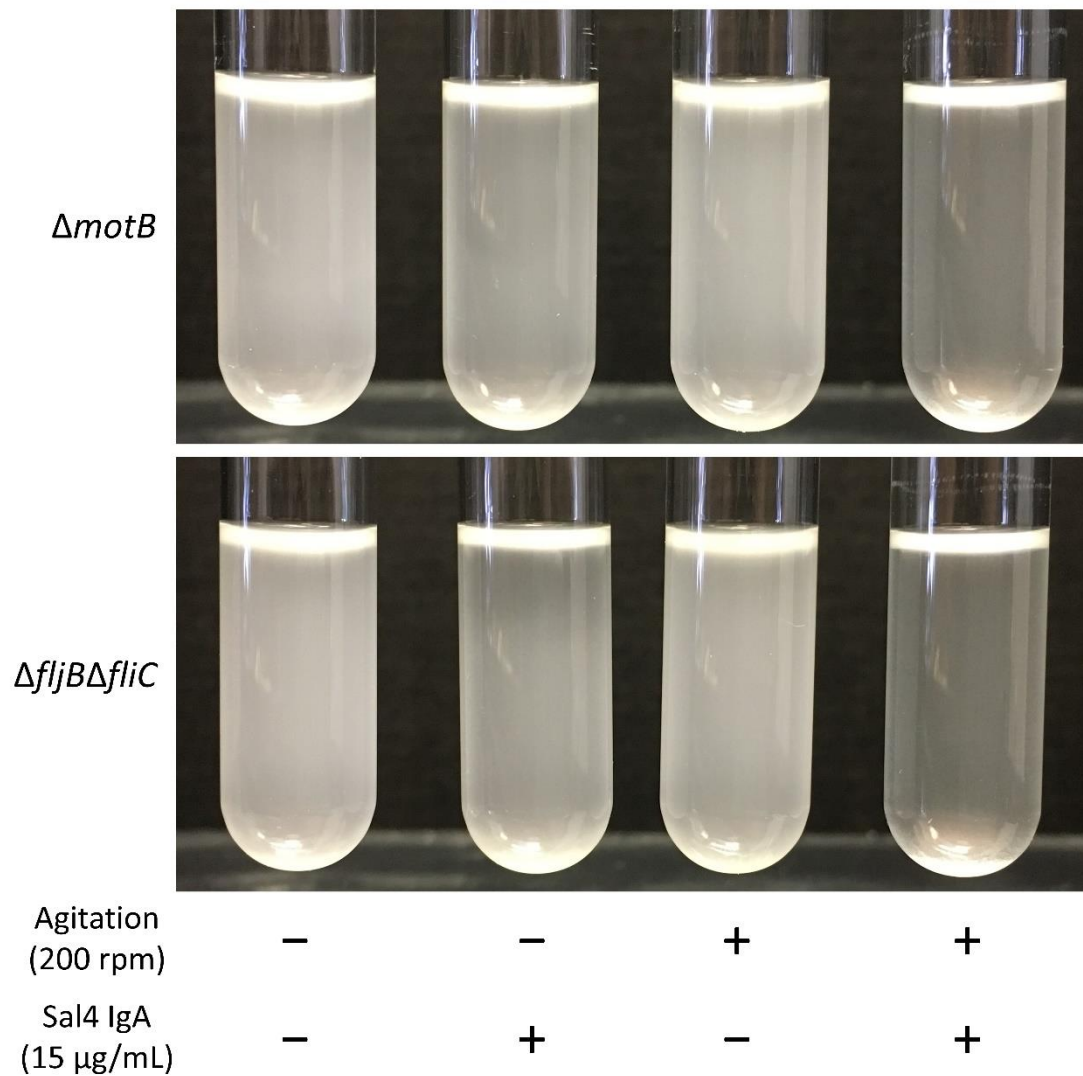

**Supplementary Figure 4. Sal4-mediated agglutination of motility-deficient mutants under static and agitated conditions.** Cultures of *ΔmotB* and *ΔfljBΔfliC* were grown to mid-log phase, washed in PBS, either left untreated or treated with 15 μg/mL of Sal4 IgA, and finally either incubated statically or with gentle agitation (200 rpm) at room temperature for two hours. Representative side-view stills of the cultures at 2 h p.t. are shown and represent two biological replicates.

**1.2 Supplementary Table 1. Primers used in this study**

| <b>Primer Name</b>    | <b>Primer Sequence (5' to 3')</b>                                                                                          |
|-----------------------|----------------------------------------------------------------------------------------------------------------------------|
| flhC_lambda_F         | GAA GTG GAC GAT ACG GCG CGT AAG AAA AGG GCA TGA TAT GTG TAG<br>GCT GGA GCT GCT TCG                                         |
| flhC_lambda_R         | ACT TAC CGC TGC TGG AGT GTT TGT CCA CAC CGT TTC GGT AAT TCC<br>GGG GAT CCG TCG ACC                                         |
| flhC_lambda_screen_F  | CAG GTA TCA TGC TTT CAA CGC G                                                                                              |
| fliC::gentR_lambda_F  | CAA TAA CAT CAA GTT GTA ATT GAT AAG GAA AAG ATC CCC CTG ATT<br>CCC TTT GTC AAC AGC                                         |
| fliC::gentR_lambda_R  | TGA TTG TGT ACC ACG TGT CGG TGA ATC AAT CGC CGG AAC TCC GCG<br>GCC GGG AAG CCG ATC                                         |
| fliC_KO_scrn_F        | CTG CCT TCG ACC AAG AAG CGG TTG                                                                                            |
| fliC_KO_scrnR         | CAG GCT CCG GAA TTA AAA AAG GC                                                                                             |
| fljB_KO_scrn_F        | TTA GTC GCT TTT CTC ATG GAG GAT TG                                                                                         |
| fljB_lambda_F         | GGA TTG CTT TAT CAA AAA CCT TCC AAA AGG AAA ATT TTT GTG TAG<br>GCT GGA GCT GCT TCG                                         |
| fljB_lambda_R         | AAG CCC CGA ATT CAC GGG GCT GAA TAA AAC GAA ATA AAT AAT TCC<br>GGG GAT CCG TCG ACC                                         |
| kanR_R                | GAG CGA GCA CGT ACT CGG ATG G                                                                                              |
| lacZ_gibson_R         | GCT TCT CGA GGA ATT CCT GCA GTT ATT TTT GAC ACC AGA CCA ACT<br>GGT AAT GGT AG                                              |
| lacZorfF              | ATG ACC ATG ATT ACG GAT TCA CTG GCC                                                                                        |
| lambda_Kan_scrnR      | GGA TTC ATC GAC TGT GGC CG                                                                                                 |
| motB_lambda_KO_scrn_F | GTA CGT TCC TCG GTA TTT TAC TGG                                                                                            |
| motB_lambda_SOE_F     | ATT GAG TTG GAA GAA CAC GTT CGC GCA GTG AGA AAC CCA AAC CAG<br>CAG CAG ACG ACT GAG GAA GCA TGA GTG TAG GCT GGA GCT GCT TCG |
| motB_lambda_SOE_R     | CAG CCA ACA GCT CGT CAG CTT CAT CAA AAA ATG TCT GAT AAA AAT<br>CGC TAA TAT CCA TGC TCA CGC TAT AAT TCC GGG GAT CCG TCG ACC |
| oafA_KO_scrn_F        | GCG CTG GTC AGT GAC CTT CTT TGA                                                                                            |
| oafA_lambda_F         | ATT TCG TCT TGT GTG GCA CCT TGG AAT TAT AGG TAA AAA GTG TAG<br>GCT GGA GCT GCT TCG                                         |
| oafA_lambda_R         | TGT TGT AGT TTT ATA AAA TAA AAA GAG GGG CAA GCC CCT AAT TCC<br>GGG GAT CCG TCG ACC                                         |
| PA1/04/03_F_gibson    | AAG CTA ATT CGA GAT CAT GCA TGT ACC ATT TAT CAG GGT TAT TGT<br>CTC A                                                       |
| PA1/04/03_R_gibson    | GTG AAT CCG TAA TCA TGG TCA TGC TTA ATT TCT CCT CTT TAA TTC<br>TAG ATG                                                     |
| pBAD-F                | ATG CCA TAG CAT TTT TAT C                                                                                                  |
| pBAD-R                | GAT TTA ATC TGT ATC AGG                                                                                                    |
| STM1987_KO_scrn_F     | TAT CGC GCT GAC GCT GTT AT                                                                                                 |
| STM1987_KO_scrn_R     | GCG CAA ATA CGG TTA CGT CC                                                                                                 |
| STM1987_lambda_kanR_F | TGA GGT CTG GCT ACC GTA AGC CAT CAG GGG GAG TTG TAT CAA TAA<br>CCA GGA GTT ACC AGG TAA TTC CGG GGA TCC GTC GAC C           |
| STM1987_lambda_kanR_R | CTA TTT CTT TTC CCG CTC CTG AGT CGC GTC GCT GGC GCA AAT ACG<br>GTT ACG TCC TGT GTA GGC TGG AGC TGC TTC G                   |
| STM2672_KO_scrn_F     | TAT CAC AAC CCG TCT GGC AC                                                                                                 |
| STM2672_KO_scrn_R     | AAG CCG TAG CTG CCA TTC TT                                                                                                 |
| STM2672_lambda_kanR_F | TAA TGC TTG CAC GGA ATC AAA AGC ATG AAT AAG GAA TTT TCT CTG<br>TCC AGG CCA ACA TTT TAA TTC CGG GGA TCC GTC GAC C           |

|                       |                                                                                                                  |
|-----------------------|------------------------------------------------------------------------------------------------------------------|
| STM2672_lambda_kanR_R | ATG GTT GCA TGA TTA GGC TGG GTC AGT GGT CTC AAC GCT GAG TCA<br>GAA ACG GCC AGG CCC TGT GTA GGC TGG AGC TGC TTC   |
| STM4551_KO_scrn_F     | TCT TTG GGG GAA TAT GGG CG                                                                                       |
| STM4551_KO_scrn_R     | TCA GGC CAT TGA GGG TTT CC                                                                                       |
| STM4551_lambda_kan_F  | GTT ATT TTC ATG TTG GCG CCC GAT TCC GTG TAT ATC ACC GAT AAA<br>TAA CGA CAA TTA CCC TAA TTC CGG GGA TCC GTC GAC C |
| STM4551_lambda_kan_R  | AAC GAT GGC AAG CGG TTT ATG GTT AAC GCT GTT GGC GTA GCA CGA<br>TTA CGC CAA CAG GAT TGT GTA GGC TGG AGC TGC TTC   |
| YhjH-F-XbaI           | GCT CTA GAC AGG GAC CGA GGG TAA AGT T                                                                            |
| YhjH-R-HindIII        | CCC AAG CTT GTT CAG CCA GAC GAA AAA GG                                                                           |

### 1.3 Supplementary Movie Legends

**Movie S1. Sal4 IgA treatment promotes agglutination of WT STm over time.** WT STm 14028s was grown to mid-log phase at 37°C and 225 rpm, harvested, washed with PBS, and standardized to an OD<sub>600</sub> value of 1.0 prior to treatment with 15 µg/mL Sal4 IgA. Agglutination was filmed for 2 hours at room temperature. Tubes from left to right: untreated WT control, WT treated with 15 µg/mL Sal4 IgA.

**Movie S2. Sal4-mediated agglutination occurs in a dose-dependent manner.** WT STm was grown to mid-log phase at 37°C and 225 rpm, harvested, washed with PBS, and standardized to an OD<sub>600</sub> value of 1.0 prior to treatment with Sal4 IgA at the indicated concentrations. Agglutination was filmed for 1 hour at room temperature. Tubes from left to right: untreated WT control, WT treated with 3.75 µg/mL, 7.5 µg/mL, 15 µg/mL, and 30 µg/mL Sal4 IgA.

**Movie S3. Sal4 IgG and IgA agglutinates WT STm over time.** WT STm was grown to mid-log phase at 37°C and 225 rpm, harvested, washed with PBS, and standardized to an OD<sub>600</sub> value of 1.0 prior to treatment with 15 µg/mL Sal4 IgG or IgA. Agglutination was filmed for 2 hours at room temperature. Tubes from left to right: untreated WT control, WT + 15 µg/mL Sal4 IgG, and WT + 15 µg/mL Sal4 IgA.

**Movie S4. Sal4 IgA agglutinates O5<sup>+</sup> STm over time.** WT and  $\Delta oafA$  STm strains were grown to mid-log phase at 37°C and 225 rpm, harvested, washed with PBS, and standardized to an OD<sub>600</sub> value of 1.0 prior to treatment with 15 µg/mL Sal4 IgA. Agglutination was filmed for 2 hours at room temperature. Tubes from left to right: untreated WT control, WT + 15 µg/mL Sal4, untreated  $\Delta oafA$  control,  $\Delta oafA$  + 15 µg/mL Sal4.

**Movie S5. Sal4-mediated agglutination is dependent on flagellar-based motility.** WT,  $\Delta motB$ ,  $\Delta flhC$ , and  $\Delta fljB\DeltafliC$  STm strains were grown to mid-log phase at 37°C and 225 rpm, harvested, washed with PBS, and standardized to an OD<sub>600</sub> value of 1.0 prior to treatment with 15 µg/mL Sal4 IgA. Agglutination was filmed for 2 hours at room temperature. Tubes from left to right: untreated WT control, WT + 15 µg/mL Sal4, untreated  $\Delta motB$  control,  $\Delta motB$  + 15 µg/mL Sal4, untreated  $\Delta flhC$  control,  $\Delta flhC$  + 15 µg/mL Sal4, untreated  $\Delta fljB\DeltafliC$  control,  $\Delta fljB\DeltafliC$  + 15 µg/mL Sal4.

**Movie S6. Sal4-mediated agglutination of 1:1 strain mixtures.** WT STm (*lacZ*<sup>+</sup>) was mixed 1:1 with WT (*lacZ*<sup>-</sup>),  $\Delta oafA$ , or  $\Delta fljB\DeltafliC$  prior to treatment with 15 µg/mL Sal4 IgA. Agglutination was filmed for 2 hours at room temperature. Tubes from left to right: untreated WT:WT control, WT:WT + 15 µg/mL Sal4, untreated WT: $\Delta oafA$  control, WT: $\Delta oafA$  + 15 µg/mL Sal4, untreated WT: $\Delta fljB\DeltafliC$  control, WT: $\Delta fljB\DeltafliC$  + 15 µg/mL Sal4.

**Movie S7. Sal4 IgA agglutinates WT and single DGC KO strains over time.** WT, *ΔSTM1987*, *ΔSTM2672*, and *ΔSTM4551* strains were grown to mid-log phase at 37°C and 225 rpm, harvested, washed with PBS, and standardized to an OD<sub>600</sub> value of 1.0 prior to treatment with 15 μg/mL Sal4 IgA. Agglutination was filmed for 2 hours at room temperature. Tubes from left to right: untreated WT control, WT + 15 μg/mL Sal4, untreated *ΔSTM1987* control, *ΔSTM1987* + 15 μg/mL Sal4, untreated *ΔSTM2672* control, *ΔSTM2672* + 15 μg/mL Sal4, untreated *ΔSTM4551* control, *ΔSTM4551* + 15 μg/mL Sal4.

**Movie S8. Sal4 IgA treatment agglutinates WT strains carrying plasmids overexpressing c-di-GMP modifying enzymes over time.** WT + pBAD24-EV, WT + pYeaJ, and WT + pYhjH were grown to mid-log phase in the presence of 0.4% arabinose at 37°C and 225 rpm, harvested, washed with PBS, and standardized to an OD<sub>600</sub> value of 1.0 prior to treatment with 15 μg/mL Sal4 IgA. Agglutination was filmed for 2 hours at room temperature. Tubes from left to right: untreated WT + pBAD24-EV control, WT + pBAD24-EV + 15 μg/mL Sal4, untreated WT + pYeaJ control, WT + pYeaJ + 15 μg/mL Sal4, untreated WT + pYhjH control, WT + pYhjH + 15 μg/mL Sal4.
